# Supplementary material for: International Cross-Sectional Survey among Healthcare Professionals on the Management of Cow’s Milk Protein Allergy and Lactose Intolerance in Infants and Children
Source: PubMed Central journal article supplement — Pediatr Gastroenterol Hepatol Nutr. 2022 May 9;25(3):263–75. doi: 10.5223/pghn.2022.25.3.263 (PMC9110852; doi:10.5223/pghn.2022.25.3.263), 2022-05-09
Supplement: pghn-25-263-s001.pdf [file pghn-25-263-s001.pdf]

**Supplementary Table 1.** Clinical survey questions (questions 1-12)

| No. | Question                                                                                                                                                                                           | Possible responses                                                                                                                                                                                                                                                                                                                                                                    |
|-----|----------------------------------------------------------------------------------------------------------------------------------------------------------------------------------------------------|---------------------------------------------------------------------------------------------------------------------------------------------------------------------------------------------------------------------------------------------------------------------------------------------------------------------------------------------------------------------------------------|
| Q1  | Which clinical signs or symptoms do you consider characteristic of IgE-mediated cow's milk allergy in infants?                                                                                     | Multiple answers:<br>Abdominal bloating; abdominal discomfort; acute stridor; anaphylaxis; atopic dermatitis; constipation; diarrhoea; facial angioedema; feeding difficulties; hives (urticaria); lip swelling; perianal excoriation; poor sleep; poor weight gain; rectal bleeding; recurrent wheezing; seizures; temperature >38.5°C; unsettled behaviour; vomiting                |
| Q2  | Which clinical signs or symptoms do you consider characteristic of non-IgE-mediated cow's milk allergy in infants?                                                                                 | Multiple answers:<br>As above                                                                                                                                                                                                                                                                                                                                                         |
| Q3  | Which clinical signs or symptoms do you consider characteristic of lactose intolerance in infants?                                                                                                 | Multiple answers:<br>As above                                                                                                                                                                                                                                                                                                                                                         |
| Q4  | Which diagnostic tests (depending on availability in your country) do you consider useful in the diagnosis of IgE-mediated cow's milk allergy in infants?                                          | Multiple answers:<br>Home challenge to cow's milk (formula); hospital challenge to cow's milk (formula); skin prick testing; specific serum IgE to cow's milk; no test performed (clinical diagnosis only); others (elimination diet, faecal occult blood, ImmunoCAP, reducing substances in stool and stool pH)                                                                      |
| Q5  | Which diagnostic tests (depending on availability in your country) do you consider useful in the diagnosis of non-IgE-mediated cow's milk allergy in infants?                                      | Multiple answers:<br>Home challenge to cow's milk (formula); hospital challenge to cow's milk (formula); skin prick testing; specific serum IgE to cow's milk; no test performed (clinical diagnosis only); others (biopsy, elimination diet, faecal occult blood, IgG casein test, ImmunoCAP, patch test, provocation test, colonoscopy, gastrointestinal endoscopy)                 |
| Q6  | Which diagnostic tests (depending on availability in your country) do you consider useful in the diagnosis of lactose intolerance in infants?                                                      | Multiple answers:<br>Breath hydrogen testing; reducing/total sugars and pH in faeces; trial of lactose-free formula; urinary galactose measurement (after an oral lactose load); no test performed (clinical diagnosis only); others (gastrointestinal biopsy)                                                                                                                        |
| Q7  | In which clinical scenarios would you recommend avoiding lactose in infants?                                                                                                                       | Multiple answers:<br>Viral gastroenteritis; cow's milk protein-induced enteropathy; food protein-induced enterocolitis syndrome (FPIES) to cow's milk; cow's milk protein-induced proctocolitis; IgE-mediated cow's milk allergy without anaphylaxis; untreated coeliac disease; atopic dermatitis; infantile asthma/persistent wheeze; persistent nasal discharge; none of the above |
| Q8  | Which formula (depending on availability in your country) is your first choice for formula-fed infants under 6 months of age with confirmed IgE-mediated cow's milk allergy (without anaphylaxis)? | Single answer only:<br>Extensively hydrolysed formula with lactose; extensively hydrolysed formula without lactose; partially hydrolysed formula; amino acid-based formula; soy-based formula; lactose-free, cow's milk-based formula; rice-based formula; goat's or sheep's milk-based formula; unsure; other types of formula                                                       |
| Q9  | When selecting a specific hypoallergenic formula for managing infants with cow's milk allergy, what are the key features that you are looking for?                                                 | Multiple answers:<br>Effective in resolving symptoms/clinical evidence; affordability; palatability/taste; brand/manufacturer; others                                                                                                                                                                                                                                                 |
| Q10 | What additional benefits does lactose in extensively hydrolysed formula provide?                                                                                                                   | Multiple answers:<br>Better taste; prebiotic effect; increased weight gain; improved calcium absorption; immune modulation (regulatory T-cells); improved iron absorption; no benefit; others                                                                                                                                                                                         |
| Q11 | At what age does primary lactose intolerance (familial hypolactasia) generally first present as a clinical problem?                                                                                | Single answer only:<br>In infants under 12 months of age; around 3 years of age; around 6 years of age/school age; in adolescents; in adults                                                                                                                                                                                                                                          |
| Q12 | In your country/region, lactose intolerance in infants (under 12 months) is commonly caused by which of the following conditions?                                                                  | Multiple answers:<br>Viral gastroenteritis; cow's milk allergy with enteropathy; congenital primary lactose intolerance; primary hypolactasia (familial); coeliac disease; giardiasis; none of the above                                                                                                                                                                              |
