# Supplementary material for: International Cross-Sectional Survey among Healthcare Professionals on the Management of Cow’s Milk Protein Allergy and Lactose Intolerance in Infants and Children
Source: PubMed Central journal article supplement — Pediatr Gastroenterol Hepatol Nutr. 2022 May 9;25(3):263–75. doi: 10.5223/pghn.2022.25.3.263 (PMC9110852; doi:10.5223/pghn.2022.25.3.263), 2022-05-09
Supplement: pghn-25-263-s002.pdf [file pghn-25-263-s002.pdf]

**Supplementary Table 2.** Clinical case scenarios (questions 13 & 14)

| Case | Presentation                                                                                                                                                                                                                                                                                                                                                                                                                                                                                                                                                                                                                                                                                              | No. | Question                                                                                                                                                                                           | Possible responses                                                                                                                                                                                                                                                                                                                                            |
|------|-----------------------------------------------------------------------------------------------------------------------------------------------------------------------------------------------------------------------------------------------------------------------------------------------------------------------------------------------------------------------------------------------------------------------------------------------------------------------------------------------------------------------------------------------------------------------------------------------------------------------------------------------------------------------------------------------------------|-----|----------------------------------------------------------------------------------------------------------------------------------------------------------------------------------------------------|---------------------------------------------------------------------------------------------------------------------------------------------------------------------------------------------------------------------------------------------------------------------------------------------------------------------------------------------------------------|
| A    | A 4-month-old infant boy presents with persistent diarrhoea and eczema. He was born at term via normal delivery and was fully breastfed to 2 months. His mother introduced supplemental cow's milk-based formula for work reasons from 2 months of age. This was associated with the development of mild-to-moderate eczema across his body and face. He also developed increased regurgitation and loose bowel motions up to 6 times daily (without visible blood). There was mild perianal excoriation. Over the past weeks, the infant's weight fell from the 25th percentile to the 10th percentile. He otherwise appeared well.                                                                      | Q13 | Apart from recommending continued breast feeding, which of the following formula types would you recommend for supplemental feeding in this situation (depending on availability in your country)? | Single answer only:<br>Extensively hydrolysed formula without lactose; extensively hydrolysed formula with lactose; partially hydrolysed formula; soy-based formula; amino acid-based formula; lactose-free, cow's milk-based formula; rice-based formula; goat's or sheep's milk-based formula; unsure; others.<br>The right answer was EHF without lactose. |
| B    | A 5-month-old infant boy presents with an acute episode of wheezing and generalised urticaria after drinking about 60 mL of cow's milk-based formula. He also vomited once and became quite lethargic and floppy. This was the second time he was given formula. He was taken to hospital for treatment and observation. All formula has since been avoided. The infant was born via Caesarean section at term and was exclusively breastfed to 5 months. Solids have not yet been introduced. He has a history of moderate atopic eczema which started from around 2 months of age. His mother has difficulties with continuing to breastfeed and would like to introduce a supplemental infant formula. | Q14 | Apart from recommending continued breast feeding, which of the following formula types would you recommend for supplemental feeding in this situation (depending on availability in your country)? | Single answer only:<br>Extensively hydrolysed formula without lactose; extensively hydrolysed formula with lactose; partially hydrolysed formula; soy-based formula; amino acid-based formula; lactose-free, cow's milk-based formula; rice-based formula; goat's or sheep's milk-based formula; unsure; others.<br>The right answer is AAF.                  |

EHF: extensively hydrolyzed formula, AAF: amino acid-based formula.
