# Supplementary material for: International Cross-Sectional Survey among Healthcare Professionals on the Management of Cow’s Milk Protein Allergy and Lactose Intolerance in Infants and Children
Source: PubMed Central journal article supplement — Pediatr Gastroenterol Hepatol Nutr. 2022 May 9;25(3):263–75. doi: 10.5223/pghn.2022.25.3.263 (PMC9110852; doi:10.5223/pghn.2022.25.3.263), 2022-05-09
Supplement: pghn-25-263-s003.pdf [file pghn-25-263-s003.pdf]

**Supplementary Table 3.** Education and training (questions 15-17)

| No. | Question                                                                                                                             | Possible responses                                                                                                                                                                                                                                                                                                                                                                                                                                                                                                                                                                                                                                                                               |
|-----|--------------------------------------------------------------------------------------------------------------------------------------|--------------------------------------------------------------------------------------------------------------------------------------------------------------------------------------------------------------------------------------------------------------------------------------------------------------------------------------------------------------------------------------------------------------------------------------------------------------------------------------------------------------------------------------------------------------------------------------------------------------------------------------------------------------------------------------------------|
| Q15 | Please rate each of the following statements according to your current clinical practice:                                            | Multiple answers (5-point Likert scale: strongly agree, agree, neutral, disagree, strongly disagree): Interested in receiving further training; understand amino acid-based formula; confident to diagnose and manage lactose intolerance; understand partially hydrolysed formula; understand lactose-free extensively hydrolysed formula; understand the differences between the various hypoallergenic and lactose-free infant formulas; confident to diagnose and manage cow's milk allergy; confident to distinguish cow's milk allergy from lactose intolerance in infants; understand lactose-containing extensively hydrolysed formula; primary lactose intolerance in infancy is common |
| Q16 | What educational resources and training tools on cow's milk allergy and lactose intolerance are currently available in your country? | Multiple answers:<br>Printed materials/handouts; lectures; online tutorials/webinars; local symposia; invited expert speakers; others                                                                                                                                                                                                                                                                                                                                                                                                                                                                                                                                                            |
| Q17 | What type of local teaching activities on cow's milk allergy and lactose intolerance would you find useful in the future?            | Multiple answers:<br>Printed materials/handouts; lectures; online tutorials/webinars; local symposia; invited expert speakers; others                                                                                                                                                                                                                                                                                                                                                                                                                                                                                                                                                            |
